# Supplementary material
Source: PubMed Central journal article supplement (PMC3637663)
Supplement: NIHMS459360-supplement-1_si_001.pdf [file NIHMS459360-supplement-1_si_001.pdf]

## Supporting Information

### Polyplex Exposure Inhibits Cell Cycle, Increases Inflammatory Response, and Can Cause Protein Expression Without Cell Division

Rebecca L. Matz,<sup>1,2</sup> Blake Erickson,<sup>2,3</sup> Sriram Vaidyanathan,<sup>2,5</sup> Jolanta F. Kukowska-Latallo,<sup>2,4</sup> James R. Baker, Jr.,<sup>2,4,5</sup> Bradford G. Orr,<sup>2,6</sup> Mark M. Banaszak Holl\*<sup>1,2,3,5</sup>

<sup>1</sup>Department of Chemistry, <sup>2</sup>Michigan Nanotechnology Institute for Medicine and Biological Sciences, <sup>3</sup>Program in Biophysics, <sup>4</sup>Department of Internal Medicine, <sup>5</sup>Department of Biomedical Engineering, <sup>6</sup>Department of Physics, University of Michigan, Ann Arbor, MI 48109

## Experimental

### *PKH26 Staining – Rationale for Short Incubation Time Prior to Transfection*

In order to maximize the dynamic range of the PKH26 fluorescence signal in these experiments, the amount of incubation time prior to transfection was minimized. The cell lines used in these experiments adhered very well to the tissue culture dishes, and throughout the experiments there were no qualitative differences in the adherence of these cell lines as compared to when the seeding times were longer. The control samples (PKH26 only) in Figures 1, 3, S2, and S5 yield a regular doubling time, demonstrating that these seeding times were sufficient to give normal cell division behavior. The data shown in Figure S1, obtained by a method independent of that used in the aforementioned figures, also shows a normal cell doubling time.

### *Cell Proliferation Assay (Figure S1)*

To test whether the proliferation rate of HeLa S3 cells changed upon staining with PKH26, cells were either stained with PKH26 or taken through the staining procedure albeit with no PKH26 present, plated at 80,000 cells/well in 12-well plates with 800  $\mu$ L complete medium, and incubated for 5 to 6 h at 37 °C with 5% CO<sub>2</sub> as described. Cells were harvested at various time points over ~2 days for flow cytometry also as previously described with the exception that 7AAD was not employed as a viability stain. The density of the cell suspensions were counted with a BD Accuri C6 Flow Cytometer<sup>®</sup> (Accuri Cytometers; Ann Arbor, MI) which reports the amount of cell suspension volume pulled for a given number of cells, and curves of best exponential fit were again determined using Microsoft<sup>®</sup> Excel<sup>®</sup>. The experiment was repeated three independent times.

### *pDNA Uptake Assay (Figure S3)*

To test the amount of pDNA uptake in HeLa S3 and 293A cells, cells were taken through the PKH26-staining procedure with no PKH26 present, plated at 80,000 cells/well in 12-well plates with 800  $\mu$ L complete medium, and incubated for 5 to 6 h at 37 °C with 5% CO<sub>2</sub> as described. Cells were transfected for 3 h as described with polyplexes formed between jetPEI<sup>TM</sup> and blank pDNA labeled with CX-rhodamine (Cat. No. MIR 3125; Mirus Bio; Madison, WI) according to the manufacturer's protocol. After 9 h further incubation in complete medium, the cells were harvested as described and analyzed for CX-rhodamine fluorescence using a BD Accuri C6 Flow Cytometer<sup>®</sup>. See Discussion S1 for full details on data interpretation.

### *Cellular Senescence Assay (Figure S6)*

HeLa S3 and 293A cells were plated in triplicate and transfected as described except that cells were not stained with PKH26 and the experiment was performed in 24-well tissue culture-treated plates (Cat. No. 353047; Becton, Dickinson and Company); all reagents and cell numbers were scaled down according to the growth area of the wells. Following exposure to jetPEI<sup>TM</sup> only or polyplexes formed between jetPEI<sup>TM</sup> and the five types of DNA, cells were tested for cellular senescence (Cat. No. KAA002; EMD Millipore; Billerica, MA) per the manufacturer's instructions at 48 h. The positive control was cells that had been exposed to 50 nM doxorubicin hydrochloride (Cat. No. 2004; AvaChem Scientific; San Antonio, TX) from 3 days prior to transfection through the time point at which cells were assayed for senescence (i.e., for 5 days total). This procedure assesses the activity of senescence-associated  $\beta$ -galactosidase (SA- $\beta$ -gal) that is identified by blue-green stained cells under light microscopy. Brightfield images were obtained with an Olympus iX70-S1F2 microscope (Olympus Corporation; Tokyo) fitted with an Olympus DP72 digital camera, and the percent of blue-green as compared to normal cells across six separate images for each sample was counted according to previously established protocols.<sup>1,2</sup>

1. Dimri, G. P.; Lee, X.; Basile, G.; Acosta, M.; Scott, G.; Roskelley, C.; Medrano, E. E.; Linskens, M.; Rubelj, I.; Pereira-Smith, O. A biomarker that identifies senescent human cells in culture and in aging skin in vivo. *Proc. Natl. Acad. Sci. U.S.A.* **1995**, *92*, 9363-9367.

2. Schwarze, S. R.; Fu, V. X.; Desotelle, J. A.; Kenowski, M. L.; Jarrard, D. F. The Identification of Senescence-Specific Genes during Induction of Senescence in Prostate Cancer Cells. *Neoplasia* **2005**, *7*, 816-823.

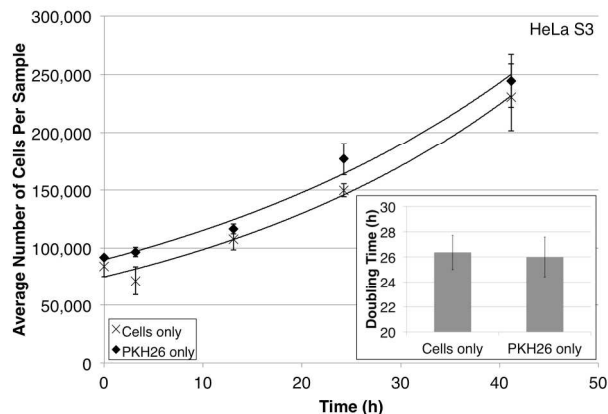

**Figure S1.** Representative data showing that, as measured by density of cell suspensions, staining with PKH26 does not affect the proliferation rate of HeLa S3 cells as compared to control cells. Each point shows the mean  $\pm$  SD of three technical replicates with curve of best exponential fit. The differences in absolute numbers of stained vs unstained cells is likely due to normal variation in cell counting prior to plating. The inset shows summary of data from three independent experiments.  $M = 26.0$ ,  $SE = 0.79$  for PKH26-stained cells as compared to  $M = 26.4$ ,  $SE = 0.92$  for control cells,  $t(4) = 0.30$ ,  $p > 0.05$ .

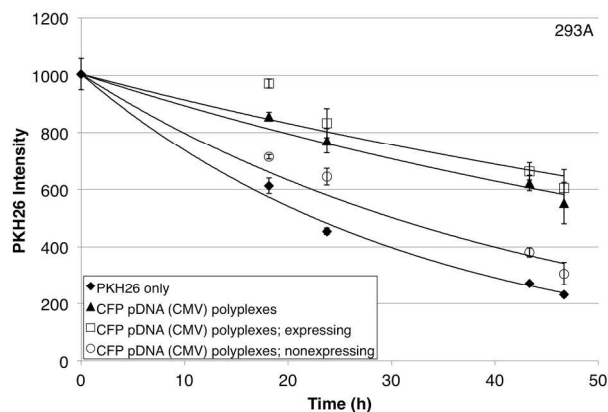

**Figure S2.** PKH26 intensity of representative 293A cells treated with polyplexes formed between jetPEI<sup>TM</sup> and CFP pDNA over 2 days following transfection as compared to control cells (PKH26 only). Cells expressing CFP (□) and those not expressing CFP (○) are subsets of the whole population (▲) that was treated with polyplexes. Cells were transfected for 3 h beginning at time = 0 h. Each point shows the mean  $\pm$  SD of three technical replicates with curve of best exponential fit. All data are fit with PKH26 only data at 0 h.

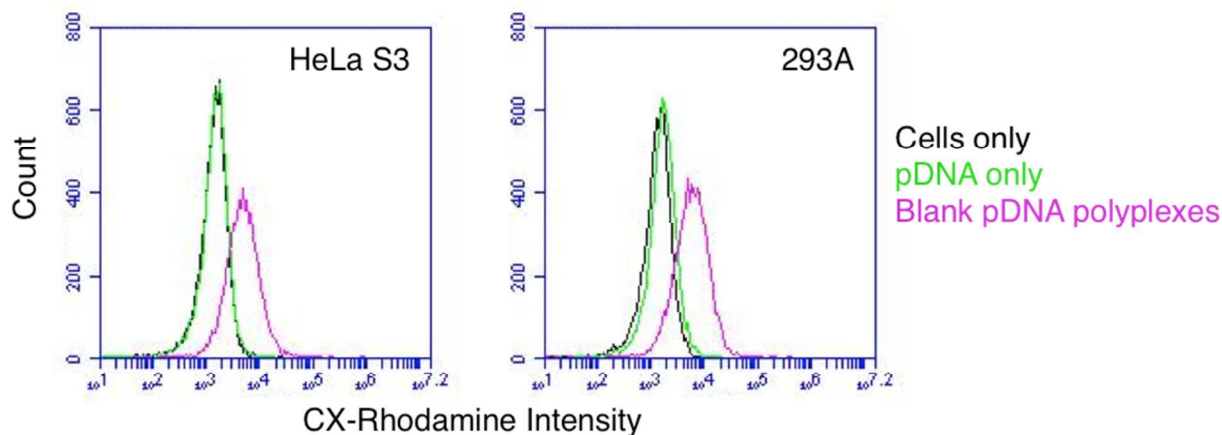

**Figure S3.** CX-rhodamine fluorescence intensity for representative HeLa S3 and 293A cells treated with polyplexes formed between jetPEI<sup>TM</sup> and CX-rhodamine-labeled blank pDNA. Cells were transfected for 3 h and incubated 9 h further before being harvested and analyzed. For HeLa S3 and 293A cells the entire population of cells exhibits a mean fluorescence shift of  $4500 \pm 240$  and  $6200 \pm 390$ , respectively, consistent with a substantial degree of transfection for all cells in the population. The mean fluorescence shifts are the mean  $\pm$  SD of three technical replicates. See Discussion S1 for full details on data interpretation.

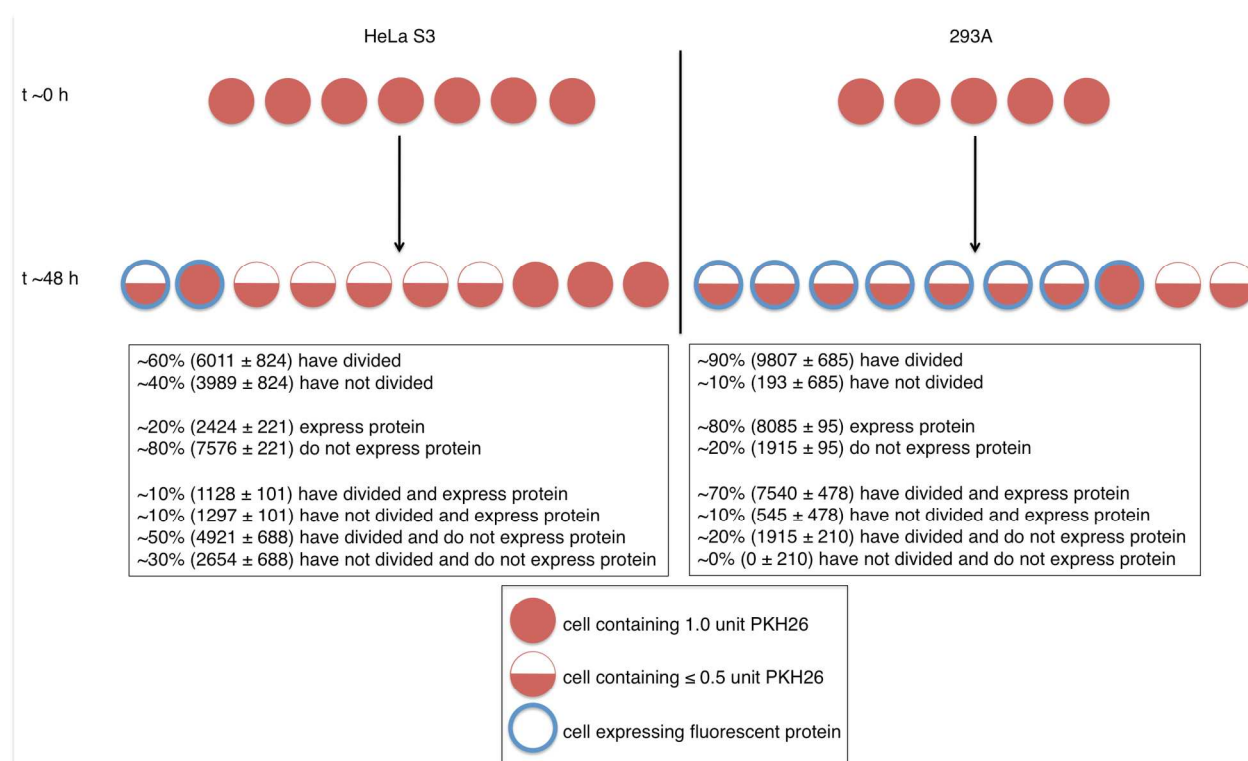

**Figure S4.** Representative schemes showing the approximate breakdown of divided vs not divided and expressing vs not expressing cells ~48 h following transfection. Division is measured by dilution of the membrane-stable dye PKH26, and expression is measured by fluorescence of the plasmid-encoded protein. The percentages are taken from the data shown in Table 1 (HeLa S3, Expt #1; 293A, Expt #3).

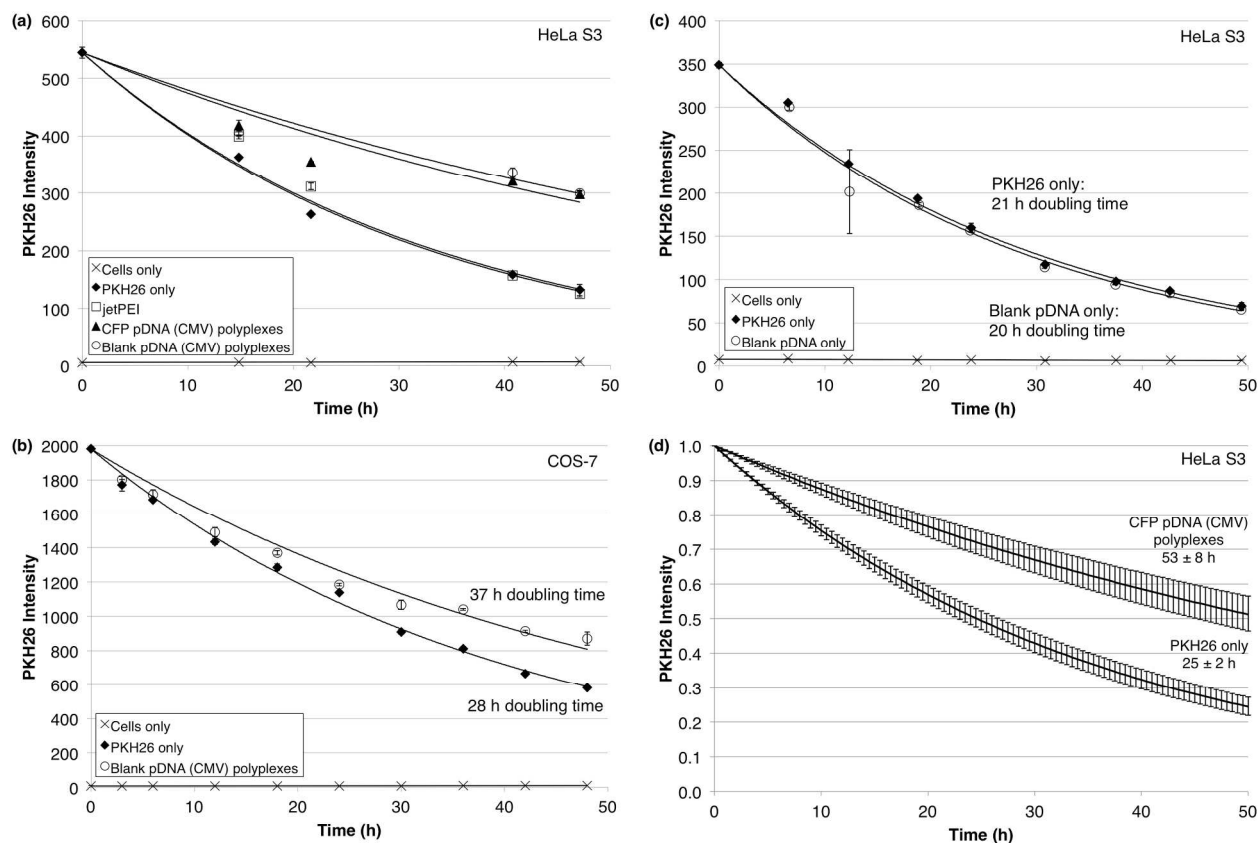

**Figure S5.** Representative data for (a) HeLa S3 and (b) COS-7 cells showing that exposure to polyplexes slows the doubling time. (c) Representative data for HeLa S3 cells showing that exposure to the pDNA alone did not affect the doubling time. The cells were transfected for 3 h beginning at time = 0 h. Each point shows the mean  $\pm$  SD of three technical replicates with curve of best exponential fit except for the cells only sample, which has a linear line of best fit. All data are fit with PKH26 only data at 0 h except for the cells only sample. (d) Average PKH26 intensity of untreated and CFP pDNA (CMV) polyplex-treated HeLa S3 cells over time based on the average doubling times shown in Figure 3b. The standard deviations reflect the standard deviations of the average doubling times.

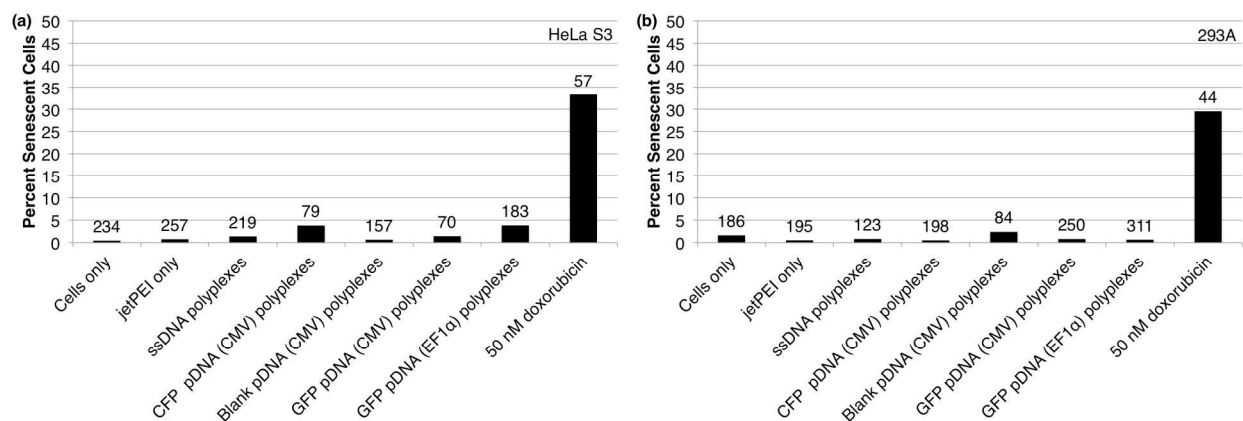

**Figure S6.** HeLa S3 (a) and 293A (b) cells do not enter cellular senescence upon exposure to the polymer alone (jetPEI<sup>TM</sup> only) or any type of polyplex used in this study. Each data point is labeled with N, the number of cells counted for that sample. N for the doxorubicin case is lower than for the other treatments because there were fewer cells per image due to doxorubicin-induced toxicity. According to Fisher's exact test, no samples are more senescent than the cells only negative control, except for the 50 nM doxorubicin positive control. \*\*\*  $p < 0.01$ .

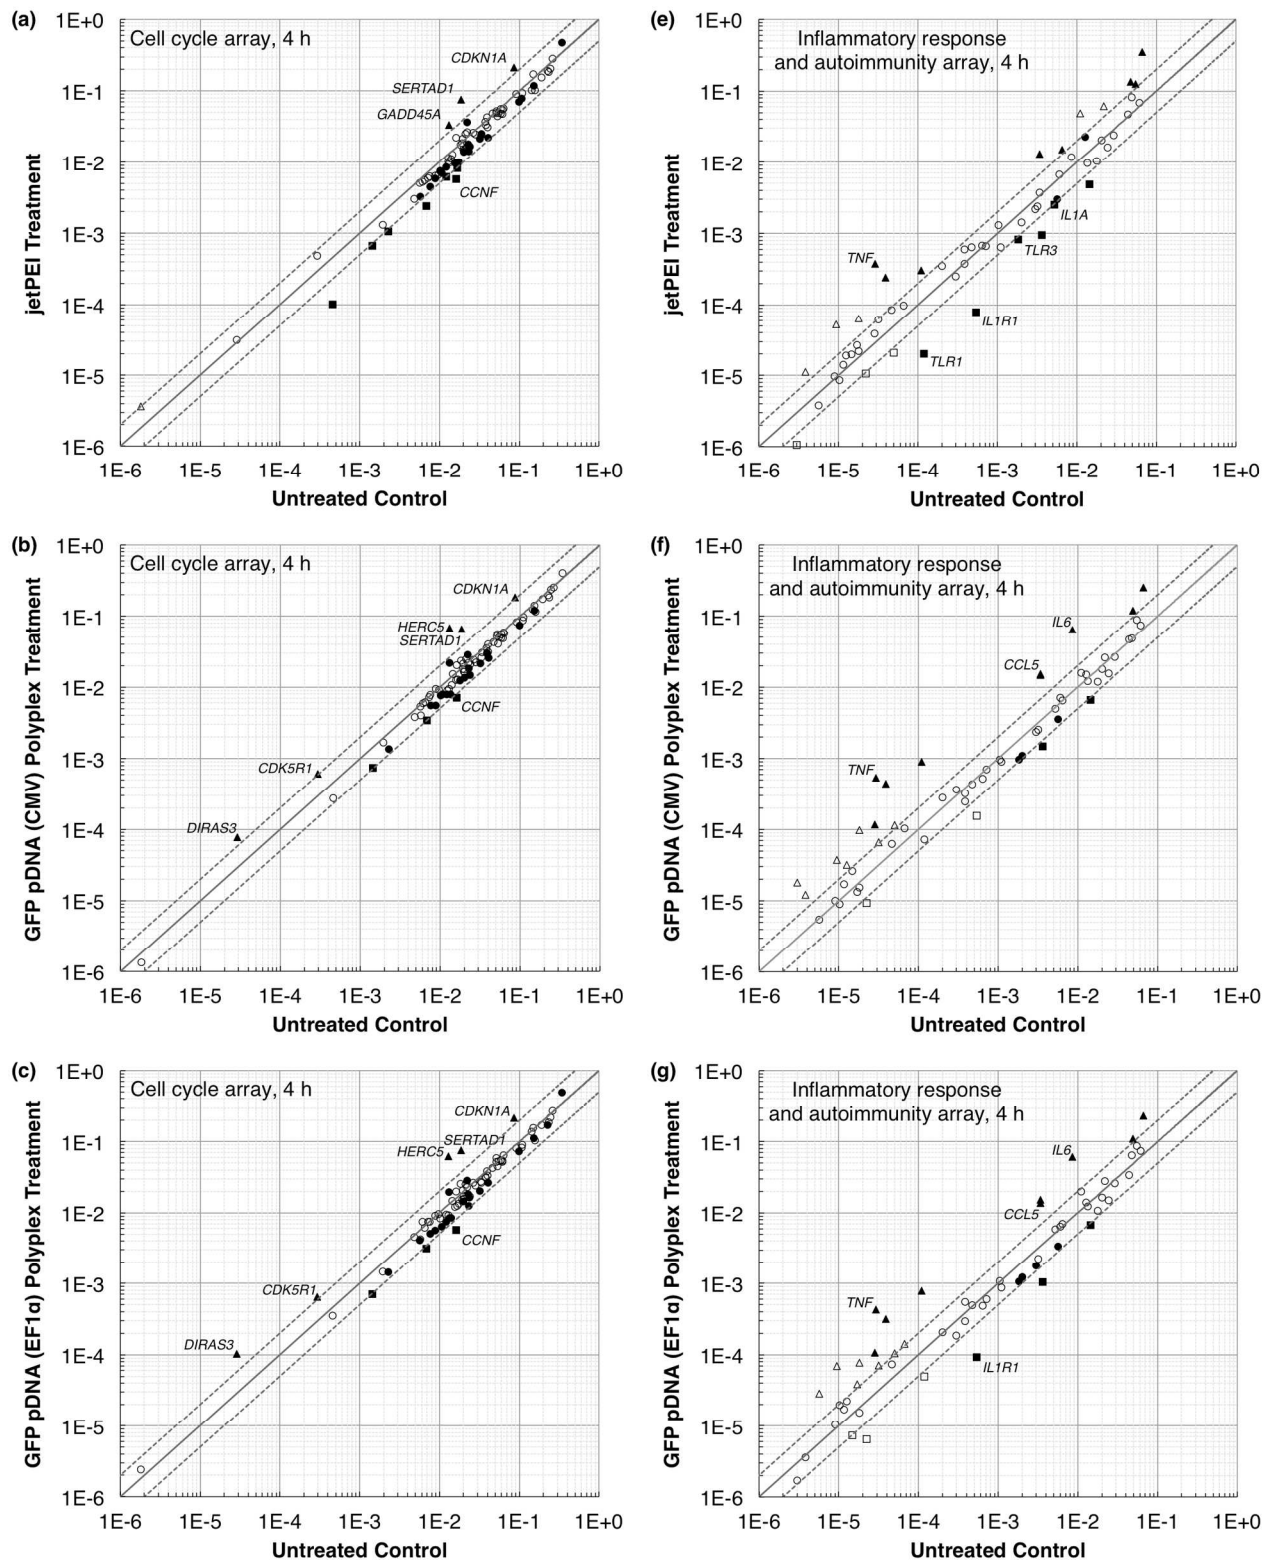

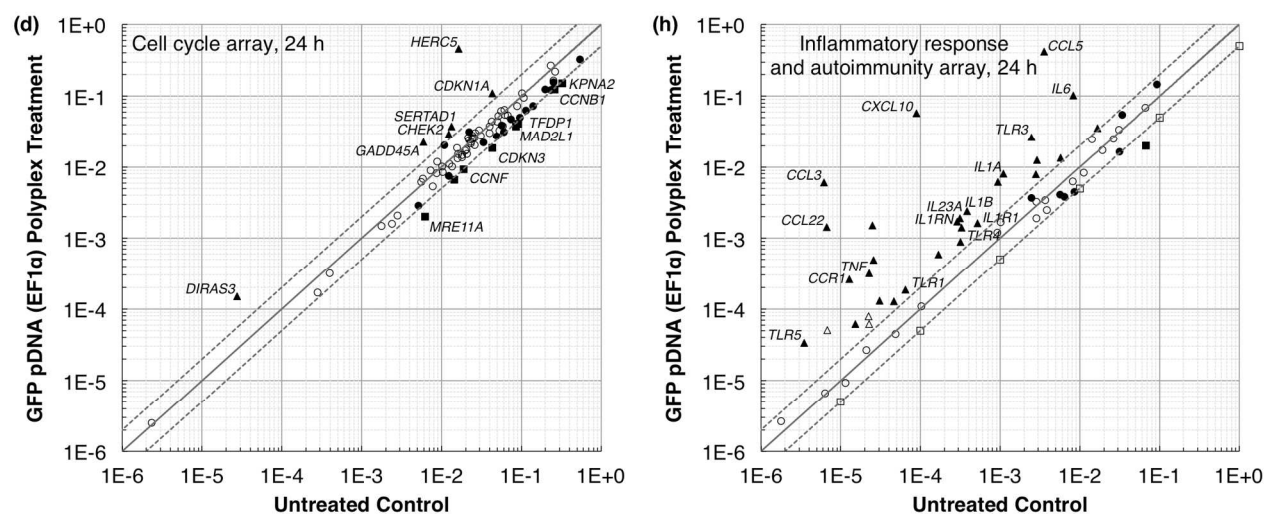

**Figure S7.** Scatterplots showing the relative number of up- ( $\blacktriangle$ ) and downregulated ( $\blacksquare$ ) genes for the jetPEI<sup>TM</sup>, GFP pDNA (CMV) polyplex, and GFP pDNA (EF1 $\alpha$ ) polyplex treatments compared to the untreated control at 4 h following transfection. The GFP pDNA (EF1 $\alpha$ ) polyplex treatment at 24 h is also shown. (a) – (d) Cell cycle array. (e) – (h) Inflammatory response and autoimmunity array. The centerline indicates a fold change ( $2^{-\Delta\Delta C_t}$ ) of 1, and the upper and lower lines indicate fold changes of 2 in gene expression. Circles indicate fold changes  $\leq 2$ . Comparing to the untreated control, filled symbols indicate regulation that is significantly different ( $p \leq 0.05$ ), and open symbols indicate regulation that is not significantly different. Only the significantly up- or downregulated genes shown in Tables 2 and 3 are labeled in this figure. Note that the cell cycle array data for the 24 h treatment with GFP pDNA (EF1 $\alpha$ ) polyplexes is based on only two biological replicates; the third had to be removed due to evident inhibition of the reverse transcription step.



**Table S1. Average doubling times of HeLa S3 and 293A cells exposed to jetPEI<sup>TM</sup> only, or polyplexes made between jetPEI<sup>TM</sup> and ssDNA or various pDNAs.**

| Treatment                   | Average Doubling Time (h) <sup>a</sup> |            |
|-----------------------------|----------------------------------------|------------|
|                             | HeLa S3                                | 293A       |
| PKH26 only (neg. control)   | 25 ± 2                                 | 25 ± 3     |
| jetPEI <sup>TM</sup> only   | 29 ± 2                                 | 24 ± 4     |
| ssDNA polyplexes            | 31 ± 1 **                              | 52 ± 9 **  |
| CFP pDNA (CMV) polyplexes   | 53 ± 8 ***                             | 46 ± 9 **  |
| Blank pDNA (CMV) polyplexes | 52 ± 9 **                              | 35 ± 4 *** |
| GFP pDNA (CMV) polyplexes   | 49 ± 8                                 | 61 ± 10 *  |
| GFP pDNA (EF1α) polyplexes  | 52 ± 10                                | 45 ± 16    |

<sup>a</sup> \*  $p < 0.10$ , \*\*  $p < 0.05$ , \*\*\*  $p < 0.01$ .

**Table S2. Changes in expression of all genes related to the cell cycle pathway in jetPEI™ or polyplex-exposed HeLa S3 cells.**

| GeneBank  | Symbol   | Description <sup>a</sup>                                                                    | Fold Change in Gene Expression <sup>b</sup> |      |                      |      |                                |      |
|-----------|----------|---------------------------------------------------------------------------------------------|---------------------------------------------|------|----------------------|------|--------------------------------|------|
|           |          |                                                                                             | jetPEI™                                     |      | GFP (CMV) polyplexes |      | GFP (EF1 $\alpha$ ) polyplexes |      |
|           |          |                                                                                             | 4h                                          | 24h  | 4h                   | 24h  | 4h                             | 24h  |
| NM_005157 | ABL1     | C-abl oncogene 1, receptor tyrosine kinase                                                  | -1.4                                        | 1.2  | -1.2                 | 1.1  | -1.3                           | 1.2  |
| NM_013366 | ANAPC2   | Anaphase promoting complex subunit 2                                                        | -1.6                                        | -1.0 | -1.3                 | -1.2 | -1.3                           | -1.2 |
| NM_013367 | ANAPC4   | Anaphase promoting complex subunit 4                                                        | -1.5                                        | 1.1  | -1.3                 | -1.1 | -1.7                           | -1.1 |
| NM_000051 | ATM      | Ataxia telangiectasia mutated                                                               | -2.1                                        | -1.3 | -1.7                 | -1.4 | -1.6                           | -1.4 |
| NM_001184 | ATR      | Ataxia telangiectasia and Rad3 related                                                      | -1.7                                        | -1.1 | -1.4                 | -1.3 | -1.5                           | -1.2 |
| NM_004324 | BAX      | BCL2-associated X protein                                                                   | -1.2                                        | 1.2  | -1.3                 | -1.1 | -1.2                           | 1.1  |
| NM_016567 | BCCIP    | BRCA2 and CDKN1A interacting protein                                                        | -1.2                                        | 1.3  | -1.1                 | -1.9 | -1.2                           | -1.9 |
| NM_000633 | BCL2     | B-cell CLL/lymphoma 2                                                                       | -1.5                                        | -1.1 | -1.2                 | -1.3 | -1.3                           | -1.5 |
| NM_001168 | BIRC5    | Baculoviral IAP repeat-containing 5                                                         | -1.1                                        | 1.0  | -1.1                 | -1.6 | -1.4                           | -1.8 |
| NM_007294 | BRCA1    | Breast cancer 1, early onset                                                                | -1.7                                        | 1.3  | -1.6                 | 1.1  | -1.9                           | 1.2  |
| NM_000059 | BRCA2    | Breast cancer 2, early onset                                                                | -2.9                                        | -1.3 | -2.0                 | 1.3  | -2.2                           | 1.2  |
| NM_031966 | CCNB1    | Cyclin B1                                                                                   | -1.3                                        | -1.1 | -1.3                 | -2.1 | -1.2                           | -2.1 |
| NM_004701 | CCNB2    | Cyclin B2                                                                                   | -1.4                                        | -1.1 | -1.3                 | -1.9 | -1.4                           | -1.8 |
| NM_005190 | CCNC     | Cyclin C                                                                                    | -1.1                                        | 1.1  | -1.1                 | -1.1 | -1.1                           | 1.0  |
| NM_053056 | CCND1    | Cyclin D1                                                                                   | -1.1                                        | 1.6  | 1.3                  | 1.0  | 1.4                            | 1.1  |
| NM_001759 | CCND2    | Cyclin D2                                                                                   | 2.0                                         | -1.1 | -1.4                 | 1.4  | 1.3                            | 1.1  |
| NM_001238 | CCNE1    | Cyclin E1                                                                                   | 1.4                                         | 1.0  | 1.3                  | -1.7 | 1.2                            | -1.3 |
| NM_001761 | CCNF     | Cyclin F                                                                                    | -2.8                                        | -1.1 | -2.3                 | -2.0 | -2.8                           | -2.0 |
| NM_004060 | CCNG1    | Cyclin G1                                                                                   | -1.0                                        | -1.4 | -1.1                 | -1.6 | -1.2                           | -1.4 |
| NM_004354 | CCNG2    | Cyclin G2                                                                                   | -1.4                                        | -1.4 | -1.3                 | 1.0  | -1.2                           | 1.2  |
| NM_001239 | CCNH     | Cyclin H                                                                                    | -1.0                                        | 1.0  | -1.1                 | -1.6 | -1.0                           | -1.5 |
| NM_001240 | CCNT1    | Cyclin T1                                                                                   | 1.2                                         | 1.5  | -1.0                 | 1.1  | 1.0                            | 1.1  |
| NM_001241 | CCNT2    | Cyclin T2                                                                                   | -1.2                                        | 1.0  | -1.0                 | 1.1  | 1.2                            | 1.1  |
| NM_003903 | CDC16    | Cell division cycle 16 homolog (S. cerevisiae)                                              | -1.5                                        | 1.1  | -1.5                 | -1.1 | -1.6                           | -1.1 |
| NM_001786 | CDC2     | Cell division cycle 2, G1 to S and G2 to M                                                  | -1.4                                        | -1.1 | -1.2                 | -1.9 | -1.3                           | -1.9 |
| NM_001255 | CDC20    | Cell division cycle 20 homolog (S. cerevisiae)                                              | -1.2                                        | -1.0 | -1.1                 | -1.6 | -1.1                           | -1.6 |
| NM_004359 | CDC34    | Cell division cycle 34 homolog (S. cerevisiae)                                              | -1.0                                        | 1.2  | -1.1                 | 1.0  | -1.3                           | 1.2  |
| NM_001798 | CDK2     | Cyclin-dependent kinase 2                                                                   | 1.0                                         | -1.1 | 1.0                  | -1.3 | 1.0                            | -1.1 |
| NM_000075 | CDK4     | Cyclin-dependent kinase 4                                                                   | -1.3                                        | -1.0 | -1.2                 | -1.8 | -1.3                           | -1.9 |
| NM_003885 | CDK5R1   | Cyclin-dependent kinase 5, regulatory subunit 1 (p35)                                       | 1.6                                         | -1.1 | 2.0                  | -2.2 | 2.2                            | -1.6 |
| NM_016408 | CDK5RAP1 | CDK5 regulatory subunit associated protein 1                                                | -1.2                                        | -1.1 | -1.1                 | -1.1 | -1.1                           | -1.1 |
| NM_001259 | CDK6     | Cyclin-dependent kinase 6                                                                   | -1.1                                        | 1.2  | 1.1                  | -1.9 | 1.1                            | -1.8 |
| NM_001799 | CDK7     | Cyclin-dependent kinase 7                                                                   | 1.2                                         | 1.1  | 1.2                  | 1.1  | 1.2                            | 1.1  |
| NM_001260 | CDK8     | Cyclin-dependent kinase 8                                                                   | -1.8                                        | 1.2  | -1.4                 | -1.4 | -1.3                           | -1.4 |
| NM_000389 | CDKN1A   | Cyclin-dependent kinase inhibitor 1A (p21, Cip1)                                            | 2.5                                         | 1.4  | 2.2                  | 2.1  | 2.5                            | 2.6  |
| NM_004064 | CDKN1B   | Cyclin-dependent kinase inhibitor 1B (p27, Kip1)                                            | -1.4                                        | 1.1  | -1.6                 | -1.3 | -1.5                           | -1.2 |
| NM_000077 | CDKN2A   | Cyclin-dependent kinase inhibitor 2A (melanoma, p16, inhibits CDK4)                         | -1.0                                        | 1.0  | -1.1                 | 1.0  | -1.1                           | 1.1  |
| NM_004936 | CDKN2B   | Cyclin-dependent kinase inhibitor 2B (p15, inhibits CDK4)                                   | 1.7                                         | 1.2  | 1.3                  | -1.0 | 1.3                            | 1.0  |
| NM_005192 | CDKN3    | Cyclin-dependent kinase inhibitor 3                                                         | -1.3                                        | -1.1 | -1.3                 | -2.3 | -1.2                           | -2.3 |
| NM_001274 | CHEK1    | CHK1 checkpoint homolog (S. pombe)                                                          | -1.3                                        | 1.0  | -1.3                 | -1.1 | -1.3                           | 1.1  |
| NM_007194 | CHEK2    | CHK2 checkpoint homolog (S. pombe)                                                          | -1.2                                        | -1.3 | 1.0                  | 2.2  | 1.0                            | 2.4  |
| NM_001826 | CKS1B    | CDC28 protein kinase regulatory subunit 1B                                                  | 1.1                                         | 1.2  | -1.0                 | 1.2  | 1.0                            | 1.2  |
| NM_001827 | CKS2     | CDC28 protein kinase regulatory subunit 2                                                   | 1.4                                         | -1.2 | 1.2                  | -1.8 | 1.4                            | -1.7 |
| NM_003592 | CUL1     | Cullin 1                                                                                    | -1.3                                        | 1.1  | -1.1                 | -1.4 | -1.3                           | -1.3 |
| NM_003591 | CUL2     | Cullin 2                                                                                    | -1.3                                        | -1.0 | -1.2                 | -1.4 | -1.4                           | -1.3 |
| NM_003590 | CUL3     | Cullin 3                                                                                    | -4.5                                        | -1.4 | -1.7                 | -1.1 | -1.3                           | -1.3 |
| NM_004399 | DDX11    | DEAD/H (Asp-Glu-Ala-Asp/His) box polypeptide 11 (CHL1-like helicase homolog, S. cerevisiae) | -1.4                                        | 1.1  | -1.2                 | -1.1 | -1.2                           | -1.1 |
| NM_004675 | DIRAS3   | DIRAS family, GTP-binding RAS-like 3                                                        | 1.1                                         | -2.8 | 2.7                  | 4.2  | 3.5                            | 5.5  |
| NM_004945 | DNM2     | Dynamain 2                                                                                  | -1.5                                        | 1.3  | -1.1                 | 1.3  | -1.0                           | 1.3  |
| NM_001950 | E2F4     | E2F transcription factor 4, p107/p130-binding                                               | -1.3                                        | 1.1  | -1.3                 | -1.1 | -1.7                           | -1.2 |
| NM_001924 | GADD45A  | Growth arrest and DNA-damage-inducible, alpha                                               | 2.5                                         | 4.0  | 1.6                  | 3.6  | 1.5                            | 3.8  |
| NM_005316 | GTF2H1   | General transcription factor IIIH, polypeptide 1, 62kDa                                     | -1.1                                        | 1.2  | 1.1                  | 1.0  | 1.0                            | -1.0 |

|           |         |                                                                     |      |      |      |      |      |      |
|-----------|---------|---------------------------------------------------------------------|------|------|------|------|------|------|
| NM_016426 | GTSE1   | G-2 and S-phase expressed 1                                         | -1.3 | -1.4 | -1.4 | -2.* | -1.4 | -1.6 |
| NM_016323 | HERC5   | Hect domain and RLD 5                                               | -1.1 | 1.4  | 5.3  | 25.8 | 4.8  | 27.9 |
| NM_004507 | HUS1    | HUS1 checkpoint homolog (S. pombe)                                  | -1.4 | -1.0 | -1.5 | -1.5 | -1.3 | -1.4 |
| NM_014708 | KNTC1   | Kinetochore associated 1                                            | -1.4 | -1.1 | -1.4 | -1.1 | -1.3 | -1.1 |
| NM_002266 | KPNA2   | Karyopherin alpha 2 (RAG cohort 1, importin alpha 1)                | -1.2 | -1.5 | -1.0 | -2.3 | -1.1 | -2.1 |
| NM_002358 | MAD2L1  | MAD2 mitotic arrest deficient-like 1 (yeast)                        | -1.1 | -1.2 | -1.1 | -2.2 | 1.0  | -2.3 |
| NM_006341 | MAD2L2  | MAD2 mitotic arrest deficient-like 2 (yeast)                        | -1.3 | -1.2 | -1.3 | -1.5 | -1.2 | -1.6 |
| NM_004526 | MCM2    | Minichromosome maintenance complex component 2                      | -1.1 | 1.2  | -1.1 | -1.2 | -1.1 | -1.1 |
| NM_002388 | MCM3    | Minichromosome maintenance complex component 3                      | -1.2 | -1.2 | -1.1 | -1.3 | -1.3 | -1.2 |
| NM_005914 | MCM4    | Minichromosome maintenance complex component 4                      | -1.2 | -1.1 | -1.2 | -1.2 | -1.1 | -1.1 |
| NM_006739 | MCM5    | Minichromosome maintenance complex component 5                      | 1.1  | -1.2 | -1.1 | -1.4 | -1.1 | -1.2 |
| NM_002417 | MKI67   | Antigen identified by monoclonal antibody Ki-67                     | -1.5 | 1.3  | -1.3 | -1.1 | -1.5 | -1.2 |
| NM_002431 | MNAT1   | Menage a trois homolog 1, cyclin H assembly factor (Xenopus laevis) | 1.1  | 1.2  | 1.1  | 1.3  | 1.1  | 1.4  |
| NM_005590 | MRE11A  | MRE11 meiotic recombination 11 homolog A (S. cerevisiae)            | -1.6 | -1.5 | -1.3 | -2.6 | -1.1 | -3.1 |
| NM_002485 | NBN     | Nibrin                                                              | -2.0 | -1.4 | -1.5 | -1.2 | -1.6 | -1.2 |
| NM_182649 | PCNA    | Proliferating cell nuclear antigen                                  | 1.1  | -1.3 | -1.1 | -1.7 | 1.0  | -1.6 |
| NM_002853 | RAD1    | RAD1 homolog (S. pombe)                                             | -1.4 | -1.3 | -1.7 | -1.9 | -1.6 | -2.2 |
| NM_002873 | RAD17   | RAD17 homolog (S. pombe)                                            | -1.5 | -1.0 | -1.6 | -1.3 | -1.6 | -1.3 |
| NM_002875 | RAD51   | RAD51 homolog (RecA homolog, E. coli) (S. cerevisiae)               | -2.2 | -1.1 | -2.0 | -1.2 | -2.1 | -1.2 |
| NM_004584 | RAD9A   | RAD9 homolog A (S. pombe)                                           | -1.2 | 1.1  | 1.0  | 1.9  | 1.0  | 1.9  |
| NM_000321 | RB1     | Retinoblastoma 1                                                    | -1.4 | -1.0 | -1.3 | -1.1 | -1.2 | -1.0 |
| NM_002894 | RBBP8   | Retinoblastoma binding protein 8                                    | 1.1  | -1.0 | 1.0  | -1.0 | -1.0 | 1.0  |
| NM_002895 | RBL1    | Retinoblastoma-like 1 (p107)                                        | -1.4 | 1.2  | -1.1 | 1.0  | -1.4 | 1.0  |
| NM_005611 | RBL2    | Retinoblastoma-like 2 (p130)                                        | -1.8 | -1.3 | -1.4 | 1.2  | -1.3 | 1.1  |
| NM_002947 | RPA3    | Replication protein A3, 14kDa                                       | -1.1 | -1.3 | -1.1 | 1.1  | -1.0 | 1.1  |
| NM_013376 | SERTAD1 | SERTA domain containing 1                                           | 4.1  | 1.7  | 3.5  | 2.8  | 4.1  | 2.8  |
| NM_005983 | SKP2    | S-phase kinase-associated protein 2 (p45)                           | -1.8 | -1.3 | -1.6 | -1.9 | -1.5 | -1.9 |
| NM_003352 | SUMO1   | SMT3 suppressor of mif two 3 homolog 1 (S. cerevisiae)              | -1.2 | -1.8 | -1.3 | -1.6 | -1.2 | -1.5 |
| NM_007111 | TFDP1   | Transcription factor Dp-1                                           | -1.2 | -1.2 | -1.3 | -2.1 | -1.2 | -2.2 |
| NM_006286 | TFDP2   | Transcription factor Dp-2 (E2F dimerization partner 2)              | -1.4 | -1.1 | 1.1  | -1.0 | 1.0  | -1.0 |
| NM_000546 | TP53    | Tumor protein p53                                                   | -2.0 | -1.7 | -1.3 | -1.6 | -1.3 | -1.6 |
| NM_003334 | UBA1    | Ubiquitin-like modifier activating enzyme 1                         | -1.4 | -1.3 | -1.1 | -1.5 | -1.0 | -1.5 |

<sup>a</sup>The gene descriptions are reproduced from the array product information from Qiagen. <sup>b</sup>Green and red shading indicate fold-changes of  $\geq 2$  and  $\leq -2$ , respectively, with  $p \leq 0.05$ . There were no genes that did not reach the cycle threshold value within 40 cycles.

**Table S3. Changes in expression of all genes related to inflammatory response and autoimmunity in jetPEI™ or polyplex-exposed HeLa S3 cells.**

| GeneBank  | Symbol | Description <sup>a</sup>                                                       | Fold Change in Gene Expression <sup>b</sup> |      |                      |        |                                |       |
|-----------|--------|--------------------------------------------------------------------------------|---------------------------------------------|------|----------------------|--------|--------------------------------|-------|
|           |        |                                                                                | jetPEI™                                     |      | GFP (CMV) polyplexes |        | GFP (EF1 $\alpha$ ) polyplexes |       |
|           |        |                                                                                | 4h                                          | 24h  | 4h                   | 24h    | 4h                             | 24h   |
| NM_001706 | BCL6   | B-cell CLL/lymphoma 6                                                          | 3.9                                         | 1.5  | 4.4                  | 2.1    | 4.5                            | 2.3   |
| NM_000064 | C3     | Complement component 3                                                         | 1.1                                         | 1.0  | 1.1                  | 1.4    | -1.3                           | -1.1  |
| NM_004054 | C3AR1  | Complement component 3a receptor 1                                             | 1.6                                         | -1.9 | -1.3                 | 18.9   | 2.3                            | 19.0  |
| NM_007293 | C4A    | Complement component 4A (Rodgers blood group)                                  | -1.0                                        | 2.2  | -1.6                 | 4.8    | -1.3                           | 2.8   |
| NM_006274 | CCL19  | Chemokine (C-C motif) ligand 19                                                | 1.2                                         | -2.1 | -1.2                 | -1.1   | -1.2                           | -1.2  |
| NM_002982 | CCL2   | Chemokine (C-C motif) ligand 2                                                 | 1.5                                         | 1.5  | 2.6                  | -6.1   | 1.8                            | -1.1  |
| NM_002989 | CCL21  | Chemokine (C-C motif) ligand 21                                                | 1.7                                         | 1.1  | 1.4                  | 1.1    | 1.0                            | 1.0   |
| NM_002990 | CCL22  | Chemokine (C-C motif) ligand 22                                                | 3.6                                         | 6.8  | 5.4                  | 272.8  | 4.3                            | 213.1 |
| NM_002991 | CCL24  | Chemokine (C-C motif) ligand 24                                                | 1.6                                         | -1.0 | -1.2                 | 1.4    | 1.4                            | 1.3   |
| NM_002983 | CCL3   | Chemokine (C-C motif) ligand 3                                                 | -1.2                                        | 46.5 | -1.1                 | 1084.1 | 1.9                            | 989.4 |
| NM_002985 | CCL5   | Chemokine (C-C motif) ligand 5                                                 | 1.1                                         | 2.4  | 4.5                  | 109.6  | 4.1                            | 116.2 |
| NM_001295 | CCR1   | Chemokine (C-C motif) receptor 1                                               | 1.4                                         | 1.1  | 1.8                  | 24.2   | -2.0                           | 20.1  |
| NM_005508 | CCR4   | Chemokine (C-C motif) receptor 4                                               | 1.5                                         | 3.2  | 1.6                  | 5.8    | 2.1                            | 2.7   |
| NM_001838 | CCR7   | Chemokine (C-C motif) receptor 7                                               | 1.9                                         | -2.3 | 2.1                  | 3.1    | 2.2                            | 3.5   |
| NM_005194 | CEBPB  | CCAAT/enhancer binding protein (C/EBP), beta                                   | 1.6                                         | 1.1  | 2.5                  | 1.7    | 2.2                            | 1.0   |
| NM_000757 | CSF1   | Colony stimulating factor 1 (macrophage)                                       | -1.1                                        | 2.1  | -1.0                 | 8.0    | -1.2                           | 6.6   |
| NM_001511 | CXCL1  | Chemokine (C-X-C motif) ligand 1 (melanoma growth stimulating activity, alpha) | 2.3                                         | -1.0 | 1.0                  | -1.3   | 1.1                            | -1.7  |
| NM_001565 | CXCL10 | Chemokine (C-X-C motif) ligand 10                                              | -2.4                                        | 2.6  | 2.3                  | 553.0  | 2.1                            | 652.0 |
| NM_002089 | CXCL2  | Chemokine (C-X-C motif) ligand 2                                               | 2.8                                         | 1.2  | 1.2                  | -1.3   | 1.3                            | -1.3  |
| NM_002090 | CXCL3  | Chemokine (C-X-C motif) ligand 3                                               | 4.4                                         | 1.2  | 1.4                  | -1.8   | 1.8                            | -1.5  |
| NM_002994 | CXCL5  | Chemokine (C-X-C motif) ligand 5                                               | 2.9                                         | -2.8 | 3.2                  | -1.1   | -1.1                           | 1.1   |
| NM_002993 | CXCL6  | Chemokine (C-X-C motif) ligand 6 (granulocyte chemotactic protein 2)           | -2.8                                        | 9.0  | 6.0                  | -1.0   | -1.8                           | 1.5   |
| NM_003467 | CXCR4  | Chemokine (C-X-C motif) receptor 4                                             | 2.3                                         | 1.3  | 1.6                  | -1.6   | 1.6                            | -1.9  |
| NM_000639 | FASLG  | Fas ligand (TNF superfamily, member 6)                                         | 1.1                                         | -1.0 | 1.1                  | 1.9    | 1.2                            | -2.1  |
| NM_001459 | FLT3LG | Fms-related tyrosine kinase 3 ligand                                           | -1.4                                        | 1.0  | -1.8                 | 2.1    | -1.6                           | 1.5   |
| NM_005252 | FOS    | V-fos FBJ murine osteosarcoma viral oncogene homolog                           | 5.3                                         | -2.5 | 3.8                  | -2.5   | 3.5                            | -3.4  |
| NM_006037 | HDAC4  | Histone deacetylase 4                                                          | -1.9                                        | 1.0  | -1.6                 | -1.5   | -1.7                           | -1.9  |
| NM_000572 | IL10   | Interleukin 10                                                                 | -1.5                                        | 1.1  | -1.0                 | 1.3    | 5.1                            | 7.6   |
| NM_000628 | IL10RB | Interleukin 10 receptor, beta                                                  | -1.7                                        | 1.1  | -1.5                 | 2.1    | -1.7                           | 1.7   |
| NM_001562 | IL18   | Interleukin 18 (interferon-gamma-inducing factor)                              | 1.1                                         | 1.1  | 1.2                  | 1.5    | 1.2                            | 1.6   |
| NM_000575 | IL1A   | Interleukin 1, alpha                                                           | -2.1                                        | 3.3  | -1.0                 | 9.0    | 1.1                            | 7.3   |
| NM_000576 | IL1B   | Interleukin 1, beta                                                            | -1.7                                        | 2.6  | -1.2                 | 7.3    | -1.3                           | 6.3   |
| NM_000877 | IL1R1  | Interleukin 1 receptor, type I                                                 | -6.8                                        | 1.0  | -3.4                 | 3.6    | -5.8                           | 3.1   |
| NM_002182 | IL1RAP | Interleukin 1 receptor accessory protein                                       | 1.1                                         | 1.1  | 1.2                  | -1.1   | 1.1                            | -1.4  |
| NM_000577 | IL1RN  | Interleukin 1 receptor antagonist                                              | 1.4                                         | 2.0  | -1.1                 | 4.6    | 1.0                            | 6.0   |
| NM_016584 | IL23A  | Interleukin 23, alpha subunit p19                                              | -1.2                                        | 1.1  | 1.2                  | 7.2    | -1.6                           | 6.1   |
| NM_000600 | IL6    | Interleukin 6 (interferon, beta 2)                                             | 1.4                                         | 1.6  | 7.5                  | 11.8   | 7.1                            | 12.4  |
| NM_000565 | IL6R   | Interleukin 6 receptor                                                         | 1.8                                         | 2.4  | 1.2                  | 1.2    | 1.1                            | -1.1  |
| NM_000584 | IL8    | Interleukin 8                                                                  | 2.8                                         | 2.6  | 1.0                  | 3.4    | 1.3                            | 2.8   |
| NM_000211 | ITGB2  | Integrin, beta 2 (complement component 3 receptor 3 and 4 subunit)             | 1.3                                         | 1.1  | -1.1                 | 1.6    | 1.0                            | 1.6   |
| NM_000595 | LTA    | Lymphotoxin alpha (TNF superfamily, member 1)                                  | 6.2                                         | 4.2  | 11.4                 | 53.8   | 8.1                            | 60.7  |
| NM_002341 | LTB    | Lymphotoxin beta (TNF superfamily, member 3)                                   | 1.8                                         | 1.6  | 1.3                  | 2.8    | 1.6                            | 4.1   |
| NM_015364 | LY96   | Lymphocyte antigen 96                                                          | -2.1                                        | 2.9  | -2.4                 | 2.5    | -3.5                           | 4.3   |
| NM_002468 | MYD88  | Myeloid differentiation primary response gene (88)                             | -1.3                                        | 1.3  | -1.3                 | 6.0    | -1.4                           | 4.3   |
| NM_004555 | NFATC3 | Nuclear factor of activated T-cells, cytoplasmic, calcineurin-dependent 3      | -1.5                                        | -1.1 | -1.6                 | -1.0   | -1.6                           | -1.1  |
| NM_003998 | NFKB1  | Nuclear factor of kappa light polypeptide gene enhancer in B-cells 1           | 1.0                                         | 1.1  | -1.1                 | 1.0    | -1.2                           | 1.1   |
| NM_000625 | NOS2   | Nitric oxide synthase 2, inducible                                             | 2.8                                         | 1.1  | 8.2                  | 4.0    | 7.2                            | 3.5   |
| NM_000176 | NR3C1  | Nuclear receptor subfamily 3, group C, member 1 (glucocorticoid receptor)      | -1.2                                        | 1.1  | -1.1                 | 1.9    | -1.1                           | 1.6   |

|              |         |                                                                     |             |      |             |             |             |             |
|--------------|---------|---------------------------------------------------------------------|-------------|------|-------------|-------------|-------------|-------------|
| NM_003821    | RIPK2   | Receptor-interacting serine-threonine kinase 2                      | -1.4        | 1.2  | -1.1        | <b>2.1</b>  | -1.1        | <b>2.2</b>  |
| NM_001039661 | TIRAP   | Toll-interleukin 1 receptor (TIR) domain containing adaptor protein | <b>-3.8</b> | -1.0 | <b>-2.4</b> | -1.1        | <b>-3.4</b> | -1.5        |
| NM_003263    | TLR1    | Toll-like receptor 1                                                | <b>-5.8</b> | 1.2  | -1.6        | <b>3.4</b>  | -2.4        | <b>2.8</b>  |
| NM_003265    | TLR3    | Toll-like receptor 3                                                | <b>-2.2</b> | 1.1  | -1.9        | <b>11.5</b> | -1.7        | <b>10.8</b> |
| NM_138554    | TLR4    | Toll-like receptor 4                                                | 1.1         | 1.6  | -1.2        | <b>3.9</b>  | -1.3        | <b>4.3</b>  |
| NM_003268    | TLR5    | Toll-like receptor 5                                                | 1.2         | -6.5 | 1.5         | 5.8         | 1.5         | <b>9.6</b>  |
| NM_006068    | TLR6    | Toll-like receptor 6                                                | <b>-3.0</b> | 1.1  | <b>-2.2</b> | -1.1        | <b>-2.1</b> | -1.3        |
| NM_016562    | TLR7    | Toll-like receptor 7                                                | 5.6         | -1.0 | 3.9         | -1.0        | 7.4         | 1.3         |
| NM_000594    | TNF     | Tumor necrosis factor (TNF superfamily, member 2)                   | <b>13.0</b> | 1.2  | <b>18.6</b> | <b>14.9</b> | <b>14.6</b> | <b>14.1</b> |
| NM_003807    | TNFSF14 | Tumor necrosis factor (ligand) superfamily, member 14               | 1.4         | 2.6  | <b>4.1</b>  | <b>5.2</b>  | <b>3.8</b>  | <b>2.8</b>  |
| NM_019009    | TOLLIP  | Toll interacting protein                                            | -1.4        | 1.2  | -1.3        | <b>1.4</b>  | -1.7        | 1.2         |

<sup>a</sup>The gene descriptions are reproduced from the array product information from Qiagen. <sup>b</sup>Green and red shading indicate fold-changes of  $\geq 2$  and  $\leq 2$ , respectively, with  $p \leq 0.05$ . Genes that were analyzed on the array but that did not reach the cycle threshold value within 40 cycles are *CCL11*, *CCL13*, *CCL16*, *CCL17*, *CCL23*, *CCL4*, *CCL7*, *CCL8*, *CCR2*, *CCR3*, *CD40*, *CD40LG*, *CRP*, *CXCL9*, *IFNG*, *IL18RAP*, *IL1F10*, *IL22*, *IL22RA2*, *IL23R*, *IL8RA*, *IL8RB*, *IL9*, *KNG1*, and *TLR2*.

**Discussion S1. Interpretation of flow cytometry for transfection (uptake) of polyplexes into HeLa S3 and 293A cells.**

For this study, it is important to quantify the fraction of the cell population that has been transfected. In order to determine the percentage of cells that have taken up polyplexes, we employed polyplexes formed between jetPEI<sup>TM</sup> and CX-rhodamine-labeled blank pDNA. The experimental details are provided above in the “pDNA Uptake Assay” and Figure S3. When interpreting the data in Figure S3, two aspects are important to keep in mind: 1) the total fluorescence shift is less than one order of magnitude and 2) the final fluorescence distributions of the control cells and the transfected cells overlap.

In the data presented in Figure S3, the entire population of HeLa S3 and 293A cells exhibit a mean fluorescence shift of  $4500 \pm 240$  and  $6200 \pm 390$ , respectively. In other words, all parts of the original fluorescence distribution of cells shift, indicating that all cells in the population have taken up the CX-rhodamine-labeled blank pDNA. This similar level of polyplex uptake across the population, at least at the level of detection of flow cytometry, is why we have treated the cells as a single transfected population for the analyses present in this paper. This general approach to treating the data is illustrated in the following schematic for two general cases of homogeneous uptake of material (cases I and II) and two general cases of inhomogeneous uptake of material (cases III and IV). The data in Figure S3 is best described by case I.

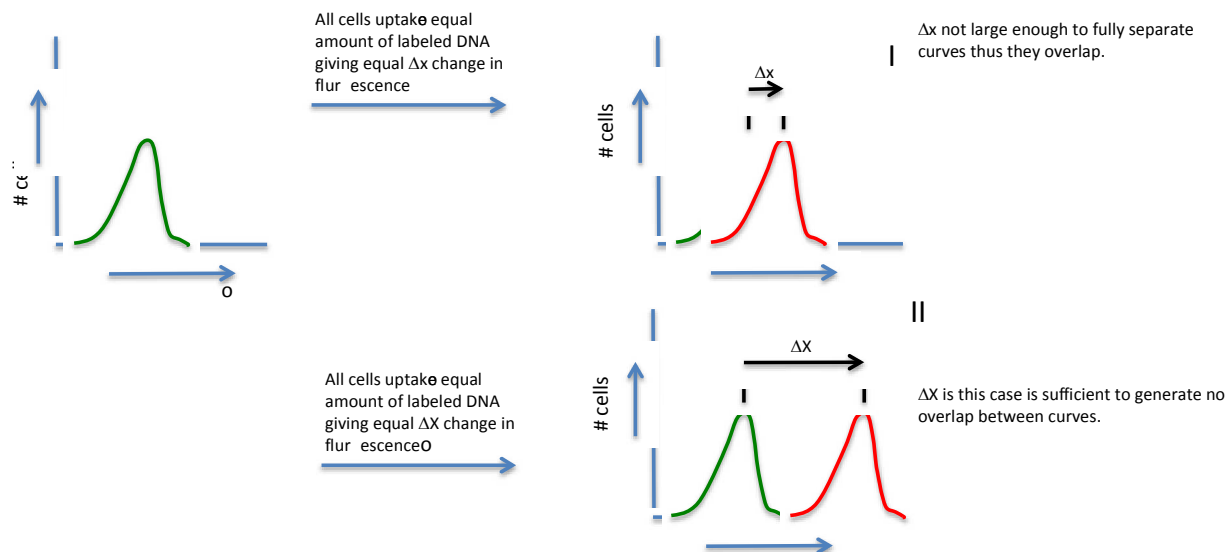

Both of cases I and II show *homogeneous* uptake of labeled DNA by the cell population, the only thing that differs is the magnitude of the fluorescence shift.

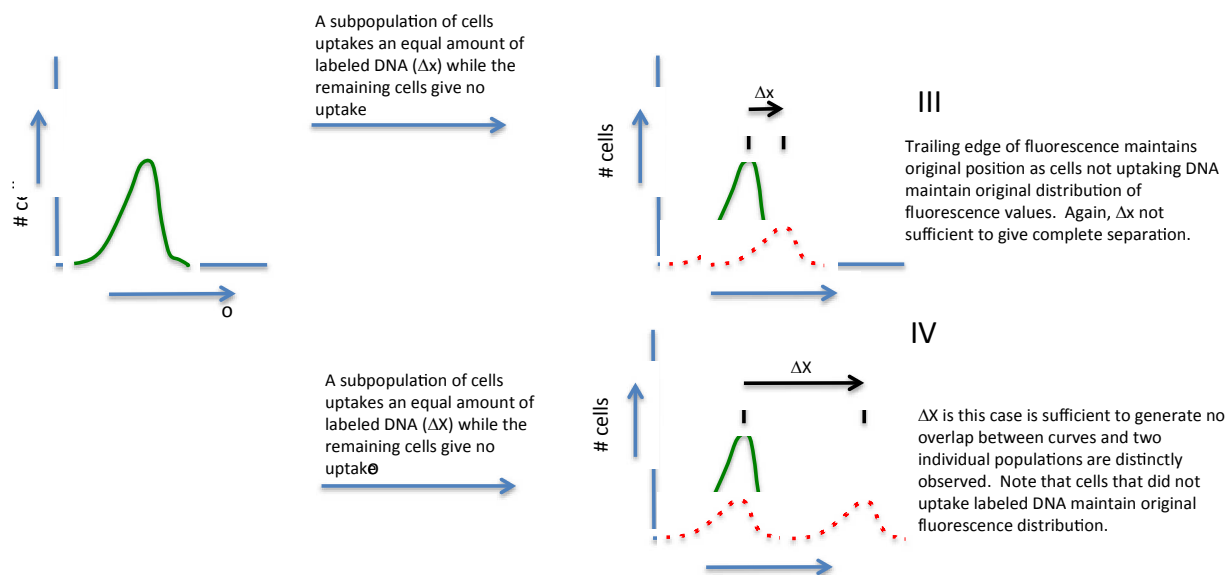

Both of cases III and IV show *inhomogeneous* uptake of labeled DNA by the cell population, the only thing that differs is the magnitude of the fluorescence shift.

We find it important to note that there is an alternative approach commonly used to interpret flow cytometry data that is inappropriate for the data shown in Figure S3. Rather than considering how the entire fluorescence distribution shifts, as we have described above, this second approach sets a cutoff defined by the fluorescence distribution of the control cells. Then,

for the transfected cells, uptake is deemed to have occurred for all cells above this cutoff level and is deemed to have not occurred for all cells below this cutoff limit.

The two approaches outlined here result in very different interpretations regarding the fraction of the cell population transfected by polyplexes in Figure S3. In the first case, the entire distribution is observed to shift in fluorescence and this fluorescence increase is ascribed to CX-rhodamine-labeled blank pDNA uptake. Therefore, roughly 100% of the cells are assigned as transfected. In the second case,  $54 \pm 3\%$  of transfected HeLa S3 have crossed the cutoff level set by the control cells, so 54% of cells are assigned as transfected. (This figure is  $68 \pm 1\%$  for the 293A cells.) Since this second method of interpreting flow cytometry data is commonly used (although often for expression experiments that give fluorescence shifts of many orders of magnitude, mostly similar to cases II and IV above), we found it necessary to adopt another approach to determine which interpretation method was providing the correct interpretation of transfection level for this data set.

In order to distinguish between these two different approaches to interpreting the flow cytometry data, we performed a new experiment in which both flow cytometry and confocal fluorescence microscopy were employed. Confocal fluorescence microscopy allows us to see a field of cells and directly count the fraction transfected. By counting multiple fields of cells, we can assess a fraction of uptake and compare this to the uptake values obtained by the two methods of interpreting the flow cytometry data.

For this control experiment, we again employed jetPEI<sup>TM</sup> and CX-rhodamine-labeled blank pDNA to form the polyplexes. Some modifications were made to the protocol used to generate Figure S3 in order to accommodate the inclusion of confocal fluorescence microscopy in the experiment.

#### *pDNA Uptake Measured by Confocal Microscopy and Flow Cytometry*

Cells were taken through the PKH26 procedure with no PKH26 present. The cells were plated at 84,210 cells/well in 2-well coverglass chambers for confocal microscopy with 800  $\mu$ L complete medium, and incubated for 5 to 6 h at 37 °C with 5% CO<sub>2</sub> for 5 hours. (The number of cells was scaled up in comparison to the 80,000 used in 12-well plates to maintain consistency in the number of cells per area for growth.) Cells were transfected for 3 h as described with polyplexes formed between jetPEI<sup>TM</sup> and CX-rhodamine-labeled blank pDNA according to the



manufacturer's protocol and incubated for 9 h in complete medium. Two replicates were used for each condition.

CX-rhodamine-labeled blank pDNA uptake was first assessed using confocal and differential interference contrast (DIC) microscopy. Confocal and DIC microscopy were performed on live cells in complete medium using a Leica SP5X inverted microscope system (Leica Microsystems GmbH; Wetzlar, Germany). DIC was performed at 405 nm. CX-rhodamine was excited at 575 nm (1.5 MW) and emission was measured between 595-800 nm.

Immediately following the microscopy measurements, the same cell samples were harvested and CX-rhodamine uptake was measured using flow cytometry. The cells were washed with DPBS, harvested with trypsin, and suspended in 400  $\mu$ L of DPBS. CX-rhodamine fluorescence was assessed using a BD Accuri C6 Flow Cytometer<sup>®</sup> by exciting at 488 nm and measuring all emission greater than 670 nm.

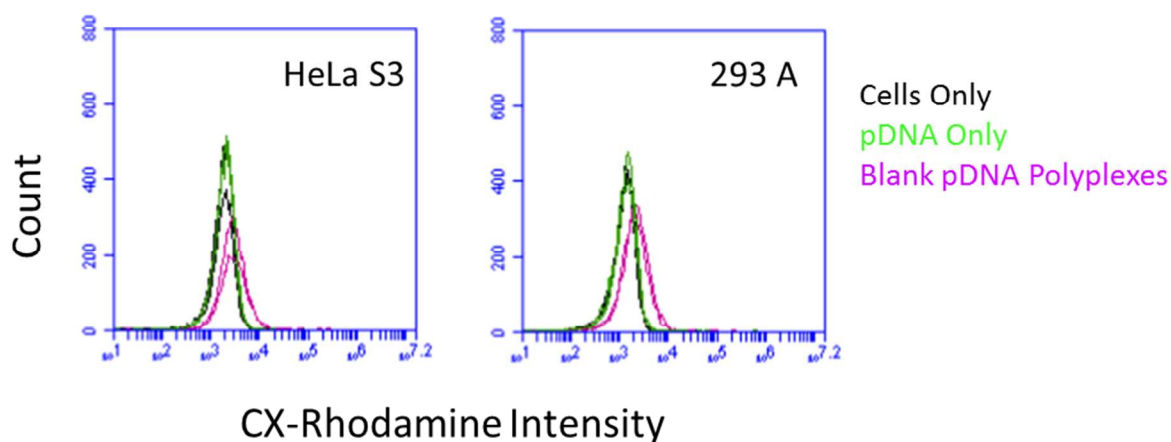

**Figure S8.** CX-rhodamine fluorescence intensity for representative HeLa S3 and 293A cells treated with polyplexes formed between jetPEI<sup>™</sup> and CX-rhodamine-labeled blank pDNA. Cells were transfected for 3 h and incubated 9 h further before being harvested and analyzed. For HeLa S3 and 293A cells the entire population of cells exhibits a mean fluorescence shift of 1443 (range of 1438 to 1448) and 1101 (1074 to 1127), respectively, consistent with a substantial degree of transfection for all cells in the population.

Once again, the entire fluorescence distribution is observed to shift with respect to the control cells (analogous to case I in the above schematic). Using the first approach to analyzing the data, we conclude that all cells have uptaken some polyplexes thus resulting in a fluorescence shift for the entire population. In other words, roughly 100% of cells have been transfected. In using the second approach to analyze the data, a cutoff is set based on the control cell population

and we conclude that roughly 20% of the cell populations has been transfected. Clearly, the two approaches to data interpretation give substantially different answers. Can this be resolved by confocal fluorescence microscopy?

For the confocal fluorescence microscopy analysis, fluorescent cells were counted in multiple fields for both 293A and HeLa S3 cells. The results are summarized in the following table with data given in each column for the total number of microscopy fields of view employed, the total number of fluorescent cells observed/total cells observed, and the percentage this represents.

| Cell Type | Cells only control | CX-rhodamine-labeled DNA only exposed cells | Polyplex-Exposed Cells |
|-----------|--------------------|---------------------------------------------|------------------------|
| HeLa S3   | 6, 0/632, 0%       | 6, 4/566, 0.7%                              | 9, 422/484, 87%        |
| 293A      | 3, 0/283, 0%       | 6, 7/763, 0.1%                              | 8, 751/793, 95%        |

In this case, the confocal data clearly supports the first approach to interpreting the flow cytometry data, and is in good agreement with the conclusion that almost all cells incorporate polyplexes, thereby exhibiting a fluorescence shift. The second method of interpreting the flow cytometry data, resulting in an estimate of roughly 20% uptake, is clearly inconsistent with the confocal microscopy analysis *of the same population of cells*. Examples of the confocal micrographs are provided below. We note that there is a difference in pDNA uptake between the data in Figure S3 (~50% to 70%) and that in Figure S8 (~20%) when measured according to the flow cytometry cutoff method. The uptake is likely lower in Figure S8 because of the additional hours that microscopy measurements added between the end of incubation and the actual flow cytometry measurements.

We conclude this supplemental discussion of the determination of the fraction of cells transfected by the polyplexes with two major conclusions. First, both flow cytometry and confocal fluorescence microscopy provide clear and conclusive evidence that ~90-100% of the 293A and HeLa S3 cells are transfected by the polyplexes under the conditions reported herein. Second, we note that the method of setting flow cytometry cutoffs to make population assessments is appropriate for data illustrated by cases II and IV in the above schematic, but is inappropriate for data illustrated by cases I and III. The data for the transfection study in this

paper is the same as case I; therefore the second method is inappropriate for interpreting the data shown in Figure S3.

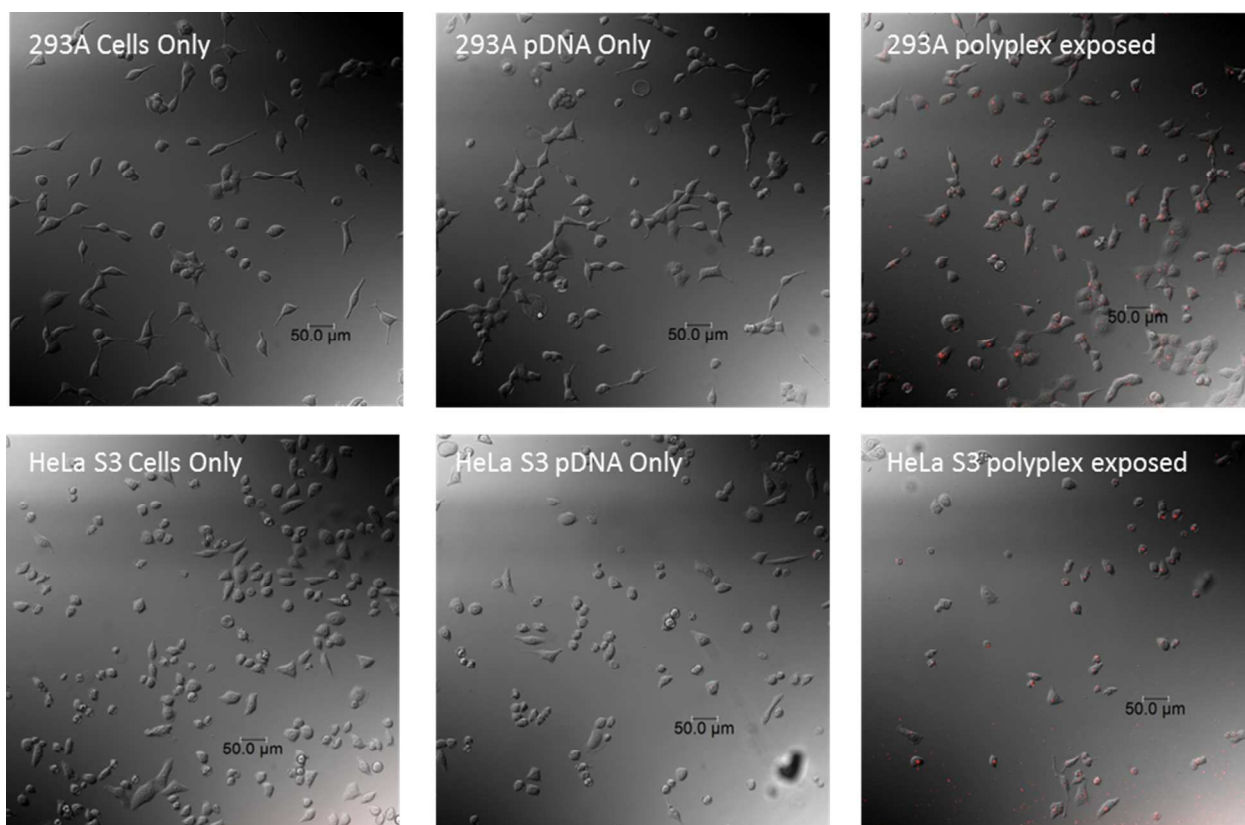

**Figure S9.** Images obtained using confocal and DIC microscopy show that 87% and 95% of HeLa S3 and 293A cells, respectively, exposed to polyplexes formed between CX-rhodamine-labeled blank pDNA and jetPEI<sup>TM</sup> are positive for CX-rhodamine.
